# Supplementary material
Source: PubMed Central journal article supplement (PMC2390738)
Supplement: tpc.108.058230_1.pdf [file tpc.108.058230_1.pdf]

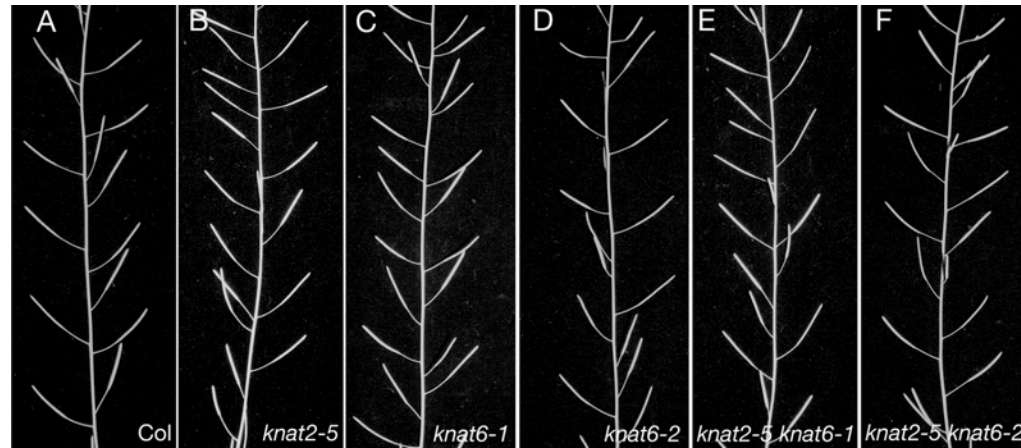

**Supplemental Figure 1.** Phenotypes of the *knat2-5*, *knat6-1*, *knat6-2*, *knat2-5 knat6-1* and *knat2-5 knat6-2* mutants.

- (A) Wild type inflorescence.
- (B) *knat2-5* inflorescence showing a wild type phenotype.
- (C) *knat6-1* inflorescence showing a wild type phenotype.
- (D) *knat6-2* inflorescence showing a wild type phenotype.
- (E) *knat2-5 knat6-1* inflorescence showing a wild type phenotype.
- (F) *knat2-5 knat6-2* inflorescence showing a wild type phenotype.

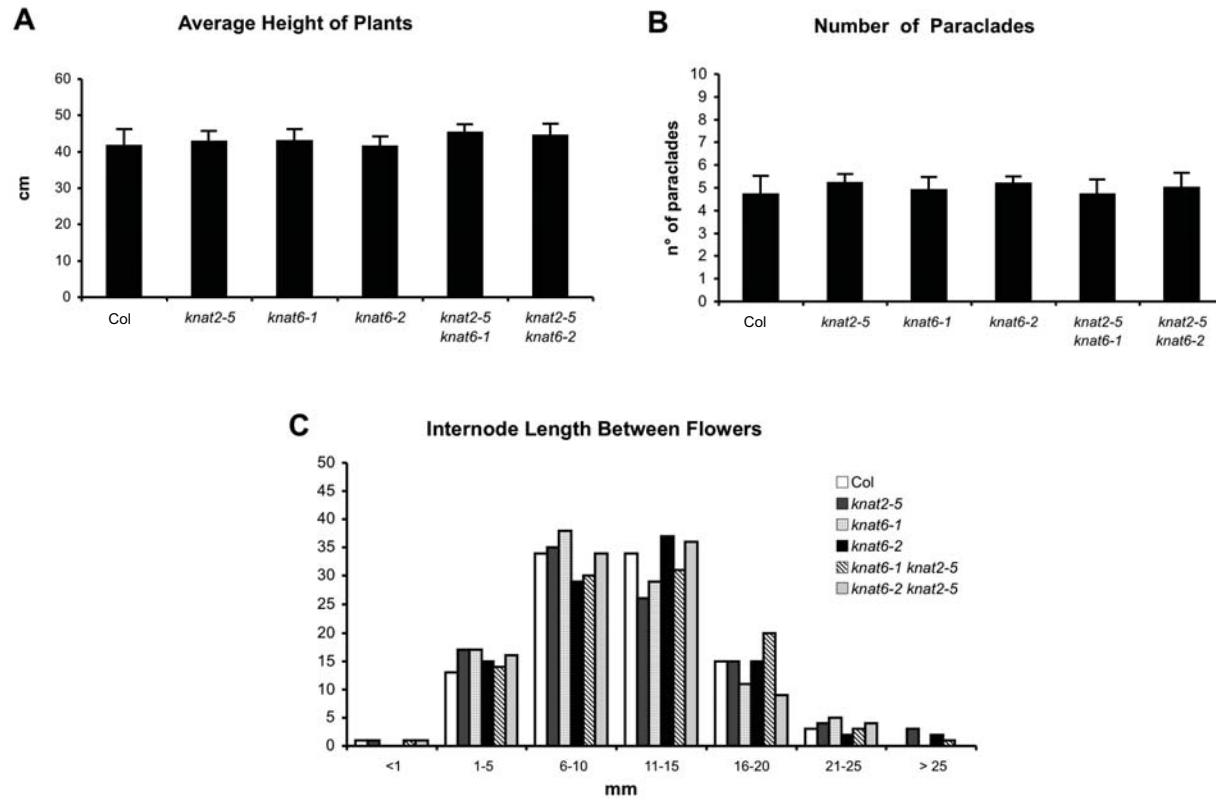

**Supplemental Figure 2.** Quantitative phenotypic analyses of the *knat2-5*, *knat6-1*, *knat6-2*, *knat2-5 knat6-1* and *knat2-5 knat6-2* mutants.

Ten plants for each genotype were analyzed.

**(A)** Average (+SD) height of wild type, *knat2-5*, *knat6-1*, *knat6-2*, *knat2-5 knat6-1* and *knat2-5 knat6-2* plants.

**(B)** Average (+SD) number of rosette paraclades of wild type, *knat2-5*, *knat6-1*, *knat6-2*, *knat2-5 knat6-1* and *knat2-5 knat6-2* plants.

**(C)** Internode lengths between flowers. The size of the internode between siliques was measured. Ten internodes between the 1<sup>st</sup> and 11<sup>th</sup> siliques, counting acropetally, were measured.

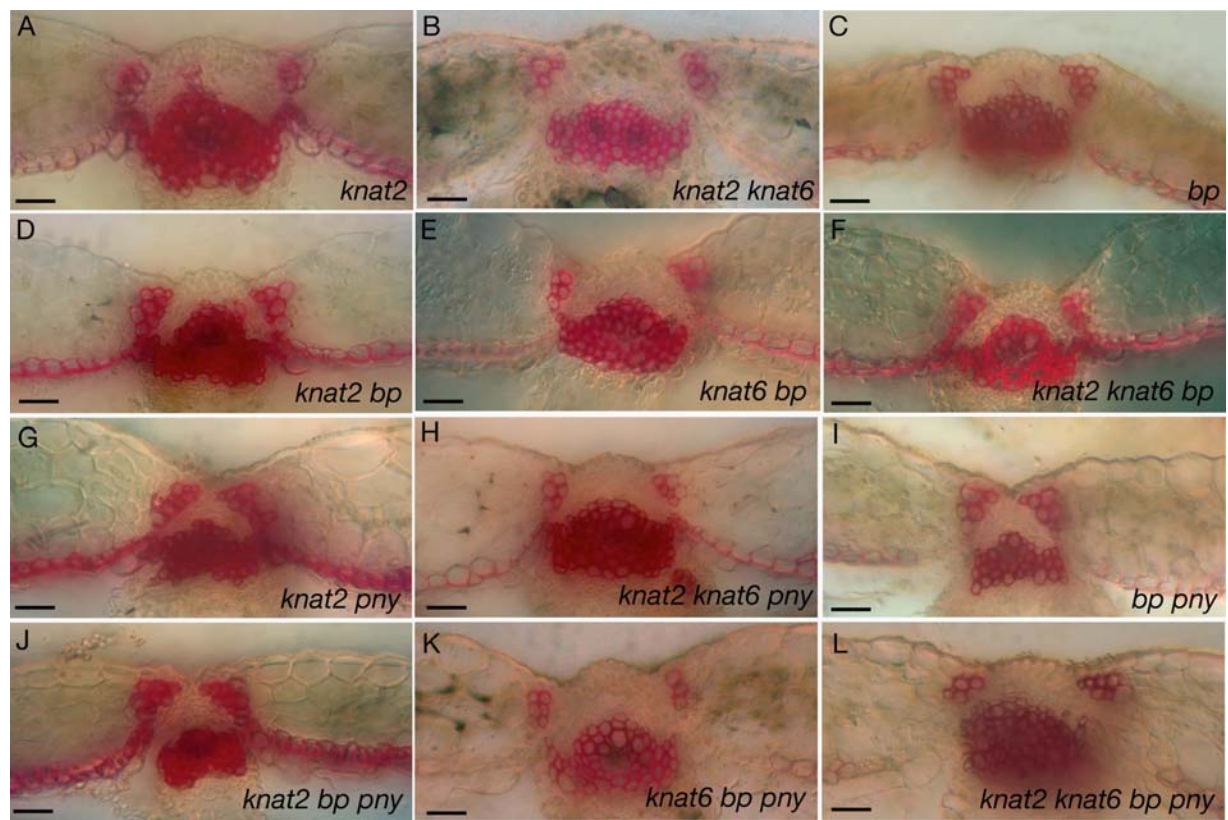

**Supplemental Figure 3.** Lignin pattern in *knat2*, *knat2 knat6*, *bp*, *knat2 bp*, *knat6 bp*, *knat2 knat6 bp*, *knat2pny*, *knat2 knat6 pny*, *bp pny*, *knat2 bp pny*, *knat6 bp pny* and *knat2 knat6 bp pny* stage 17 carpels.

**(A)** Transverse section of the *knat2* replum stained with phloroglucinol to detect lignification (pink). The lignification was detected at the valves margins and in the inner replum as in wild type (Figure 8B). Bar = 40 mm.

**(B)** Transverse section of *knat2 knat6* carpel showing a wild type lignification pattern (bar = 40 mm).

**(C)** Transverse section of *bp* carpel showing a wild type lignification pattern (bar = 40 mm).

**(D)** Transverse section of *knat2 bp* carpel showing a wild type lignification pattern (bar = 40 mm).

**(E)** Transverse section of *knat6 bp* carpel showing a wild type lignification pattern (bar = 40 mm).

**(F)** Transverse section of *knat2 knat6 bp* carpel showing a wild type lignification pattern (bar = 40 mm).

**(G)** Transverse section of *knat2 pny* carpel showing the lignified layer that extends across the replum as in *pny* fruit (Figure 8E). The inactivation of *KNAT2* did not alter *pny* defect (bar = 40 mm).

**(H)** Transverse section of *knat2 knat6 pny* carpel showing a wild type lignification pattern. The inactivation of *KNAT6* rescued *pny* defect (bar = 40 mm).

**(I)** Transverse section of *bp pny* fruit showing the lignified layer that extends across the replum as in *pny* fruit (Figure 8E). Bar = 40 mm.

**(J)** Transverse section of *knat2 bp pny* fruit. The inactivation of *KNAT2* did not alter *bp pny* defect (bar = 40 mm).

**(K)** Transverse section of *knat6 bp pny* fruit showing a wild type lignification pattern. The inactivation of *KNAT6* rescued replum defect (bar = 40 mm).

**(L)** Transverse section of *knat6 knat2 bp pny* fruit showing a wild type lignification pattern. The inactivation of *KNAT6* rescued replum defect (bar = 40 mm).

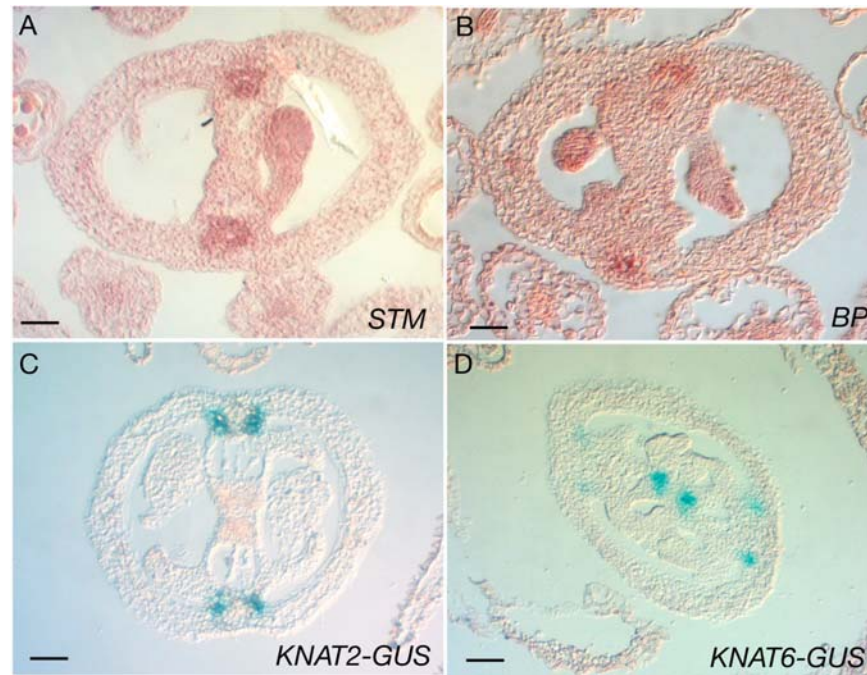

**Supplemental Figure 4.** *KNAT* class I members expression domains were distinct in wild type carpel.

- (A)** Cross section of a carpel showing *STM* mRNA accumulation in the replum (bar = 40 mm).
- (B)** Cross section of a carpel showing *BP* mRNA accumulation in the replum (bar = 40 mm).
- (C)** Cross section of a carpel showing *KNAT2-GUS* activity in valves margins (bar = 40 mm).
- (D)** Cross section of a carpel showing *KNAT6-GUS* activity in valves margins (bar = 40 mm).
